# Supplementary material
Source: HighWire-hosted journal article supplement (https://informatics.bmj.com/content/30/1/e100767)
Supplement: inline-supplementary-material-2 [file inline-supplementary-material-2.pdf]

Supplement Table 1. Study characteristics

| Author (Country)<br>Study type                                            | Population                                                                                                  | Age in years (median unless otherwise stated)                                                                                        | n     | Reference standard                                                      | Model output                                                                     | Delirium occurrence                                    |
|---------------------------------------------------------------------------|-------------------------------------------------------------------------------------------------------------|--------------------------------------------------------------------------------------------------------------------------------------|-------|-------------------------------------------------------------------------|----------------------------------------------------------------------------------|--------------------------------------------------------|
| Jauk 2020 (Austria) -<br><b>Prospective multi-centre cohort</b>           | Patients in surgical or internal medicine wards of a public hospital                                        | 71 (IQR: 57-80)                                                                                                                      | 4765  | ICD10 F05 or F10.4                                                      | Delirium risk during hospital stay manually-checked free-text patient summaries. | 1.5%                                                   |
| Jauk 2022 (Austria) –<br><b>Prospective single-centre cohort</b>          | Patients in trauma surgery wards of one hospital                                                            | 60 (Range: 18-95)                                                                                                                    | 93    | A senior physician's estimation of delirium risk                        | Not stated directly in text but likely same as former deployment study above.    | 1.2%                                                   |
| Sun 2022 (Germany)<br><b>Prospective multi-centre cohort</b>              | Patients in surgical wards of three hospitals                                                               | 66.0, 61.3, and 64.8 for the three hospitals (among retrospective data)                                                              | 17944 | CAM-ICU                                                                 | Delirium before and after surgery                                                | 9.2%, 3.0%, and 3.0% for three hospitals               |
| Kramer 2017 (Austria)<br><b>Retrospective multi-centre cohort</b>         | Patients in psychogeriatric and internal medicine wards of Austrian hospital network                        | Patients without delirium, ~75 (IQR: ~58 - ~81)<br>Patients with delirium ~80 (~75 – 83)                                             | 9221  | ICD-10 code F05                                                         | Delirium risk during hospital stay                                               | 24.1%                                                  |
| Bishara 2022 (United States)<br><b>Retrospective multi-centre cohort</b>  | Patients ≥18 years undergoing operative procedure requiring anaesthesia in two non-trauma adult hospitals   | 73.8 (SD: 15.0) for delirium cohort and 59.2 (15.2) for non-delirium cohort                                                          | 24885 | Nursing Delirium Screening Scale (Nu-DESC) score >2 or positive CAM-ICU | Delirium during the first seven postoperative days                               | 5.3%                                                   |
| Cano-Escalera 2022 (Spain)<br><b>Prospective single-centre cohort</b>     | Patients admitted to internal medicine and neurology wards at a university hospital                         | 84.4 (SD: 7.8)                                                                                                                       | 170   | CAM                                                                     | Delirium risk during hospital stay                                               | Admittance reason is delirium for 22.94%               |
| Coombes 2021 (United States)<br><b>Retrospective single-centre cohort</b> | Patients admitted to ICU at a single Boston hospital from 2001 to 2012.                                     | <30 = 4.6%;<br>30-39% = 5.3%;<br>40-49 = 10.6%;<br>50-59 = 17.3%;<br>60-69 = 20.8%;<br>70-79 = 20.7%;<br>80-89= 15.3%;<br>90+ = 5.4% | 48451 | ICD-9 codes                                                             | Delirium risk during hospital stay                                               | 3,850 of 48,541 patients developed delirium (8.6%)     |
| Corradi 2018 (United States)<br><b>Retrospective single-centre cohort</b> | Patients admitted to medical, surgical and intensive care wards in a Chicago hospital between 2021 and 2015 | Mean 63.2 (SD 17.7): years for training dataset;<br>63.4 years (SD: 17.6 for validation dataset                                      | 64038 | CAM                                                                     | Delirium occurring at least 48 h into a hospital stay.                           | 5.4% for training dataset;<br>5.5% for testing dataset |

| Author (Country)<br>Study type                                            | Population                                                                                                                                                                         | Age in years (median unless otherwise stated)                               | n     | Reference standard                                                                                                                      | Model output                                                                             | Delirium occurrence                                   |
|---------------------------------------------------------------------------|------------------------------------------------------------------------------------------------------------------------------------------------------------------------------------|-----------------------------------------------------------------------------|-------|-----------------------------------------------------------------------------------------------------------------------------------------|------------------------------------------------------------------------------------------|-------------------------------------------------------|
| Davoudi 2017 (United States)<br><b>Retrospective single-centre cohort</b> | All patients ≥18 years admitted to a hospital in Florida.                                                                                                                          | 56 (25%-75%: 43 – 68)                                                       | 51457 | ICD-9 codes                                                                                                                             | Delirium occurring at any time during hospital stay identified using the ICD-9-CM codes. | 3.1%                                                  |
| Gutheil 2022 (Austria)<br><b>Retrospective multi-centre cohort</b>        | Patients admitted to 26 Austrian acute geriatric care facilities                                                                                                                   | NR                                                                          | 63031 | ICD-9 codes                                                                                                                             | Delirium during hospital stay                                                            | 2.0%                                                  |
| Halladay 2018 (United States)<br><b>Retrospective multi-center cohort</b> | Veterans ≥65 years admitted to a VA medical center for congestive heart failure, acute coronary syndrome, community-acquired pneumonia, and chronic obstructive pulmonary disease. | Mean 75.95 (SD: 8.61) in training cohort; 75.43 (8.55) in validation cohort | 39377 | Presence of (1) delirium, (2) change in mental status, (3) disoriented, (4) confused, (5) unarousable, (6) lethargic, and (7) obtunded. | Delirium risk during hospital stay                                                       | 8.5% for training dataset; 7.0% for testing dataset   |
| Hu 2022 (China)<br><b>Retrospective single-center cohort</b>              | Surgical patients in a University hospital who underwent general anaesthesia.                                                                                                      | 68 (IQR: 65.0 - 73.3) for training and 68.0 (64.0 - 72.0) testing cohorts   | 531   | CAM                                                                                                                                     | Post-operative delirium                                                                  | 21.3% for training dataset; 30.5% for testing dataset |
| Jauk 2018 (Austria)<br><b>Retrospective multi-centre cohort</b>           | Inpatients diagnosed with delirium at an Austrian hospital network between 2012 and 2016; Control group of randomly selected patients added to the data set                        | NR                                                                          | 29568 | ICD-10 code F05                                                                                                                         | Delirium risk during hospital stay                                                       | 4596 of 29568 (15.5%)                                 |
| Ji 2018 (China)<br><b>Prospective single-centre pilot</b>                 | Non-cardiac surgical ICU patients aged 65 or more at one hospital                                                                                                                  | Mean: 77.05 (SD: 7.38)                                                      | 134   | Ten-point rating scale based on Richmond Agitation-Sedation Scale and CAM-ICU                                                           | Delirium risk during hospital stay                                                       | 11.9%                                                 |
| Kurusu 2022 (Japan)<br><b>Secondary analysis of multi-centre trial</b>    | Patients with advanced cancer receiving antipsychotics or trazedone at 14 inpatient palliative care units during September 2015 to May 2016                                        | Mean 73.2 (SD: 11.16) for remitters; 71.7 (SD: 11.39) for non-remitters     | 668   | Delirium Rating Scale-Revised-98 (DRS-R-98) score <10                                                                                   | Delirium on day 3 of hospital stay                                                       | Only patients with delirium diagnosis included (100%) |

| Author (Country) Study type                                                 | Population                                                                                                                                                                     | Age in years (median unless otherwise stated)                                                  | n     | Reference standard                                                                                           | Model output                                                                                                   | Delirium occurrence                                   |
|-----------------------------------------------------------------------------|--------------------------------------------------------------------------------------------------------------------------------------------------------------------------------|------------------------------------------------------------------------------------------------|-------|--------------------------------------------------------------------------------------------------------------|----------------------------------------------------------------------------------------------------------------|-------------------------------------------------------|
| Li 2022 (China)<br><b>Prospective single-centre cohort</b>                  | Patients aged ≥70 years admitted to internal medicine wards at a University hospital from March 2016 to January 2017.                                                          | 84 (IQR: 79-87)                                                                                | 740   | CAM                                                                                                          | Delirium from 24 hours after admission to to discharge or up to 14 days.                                       | 13.6%                                                 |
| Lucini 2020 (Canada)<br><b>Retrospective multi-centre cohort</b>            | Inpatients admitted to one of 15 ICUs in Alberta between January 1, 2014 and June 30, 2016.                                                                                    | 58 (IQR: 45-69)                                                                                | 10475 | Richmond Agitation-Sedation Scale score (RASS) and Intensive Care Delirium Screening Checklist score (ICDSC) | Delirium during ICU stay                                                                                       | 53.6%                                                 |
| Menzenbach 2022 (Germany)<br><b>Prospective single-centre cohort</b>        | Surgical patients recruited during preoperative evaluation between 3rd September 2018 and 2nd October 2019 at a University hospital's anaesthesiology and standard care units. | Mean: 72.3 (SD: 7.3)                                                                           | 978   | CAM-ICU, CAM, 4AT, DOS                                                                                       | Post-operative delirium during 5-day stay                                                                      | 22.2% in training cohort; 25.7% in validation cohort. |
| Mufti 2019 (Canada)<br><b>Retrospective, single-centre cohort</b>           | Patients undergoing cardiac surgery at one hospital between January 2006 and December 2012.                                                                                    | Mean 72.0 (SD 10.0) for delirium cases; 66.0 (SD 11.0) for non-delirium cases                  | 5584  | Richmond Agitation-Sedation Scale (RASS) & CAM-ICU                                                           | Delirium during the hospital stay                                                                              | 11.4%)                                                |
| Netzer 2020 (Austria)<br><b>Retrospective, single-centre cohort</b>         | Patients admitted to two geropsychiatric wards in one hospital between March and October 2019.                                                                                 | NR                                                                                             | 318   | DOSS, CAM, ICD 10                                                                                            | Delirium risk during hospital stay                                                                             | 3.7%                                                  |
| Oh 2018 (South Korea)<br><b>Retrospective, single-centre cohort</b>         | Patients selected from mixed medical/surgical ICU of a University hospital between November 2016 and December 2016.                                                            | Mean age 63.9 (SD 20.9) years for delirium cases; 63.2 (SD 18.0) years for non-delirium cases. | 94    | DSM-5 and CAM-ICU                                                                                            | Delirium during ICU stay                                                                                       | 41.5%                                                 |
| Oosterhoff 2021 (United States)<br><b>Retrospective, multicentre cohort</b> | Geriatric patients undergoing operative hip fracture fixation entered into the American College of Surgeons National Surgical Quality                                          | 66.6% of participants ≥ 80 years                                                               | 28207 | CAM-ICU                                                                                                      | Delirium within 30 days following hip fracture surgery as defined by the Hip Fracture Targeted ACS-NSQIP files | 28.5%                                                 |

| Author (Country) Study type                                  | Population                                                                                                                                                                      | Age in years (median unless otherwise stated)                               | n      | Reference standard | Model output                       | Delirium occurrence       |
|--------------------------------------------------------------|---------------------------------------------------------------------------------------------------------------------------------------------------------------------------------|-----------------------------------------------------------------------------|--------|--------------------|------------------------------------|---------------------------|
|                                                              | Improvement Program database (ACS NSQIP) from 2016 through 2019.                                                                                                                |                                                                             |        |                    |                                    |                           |
| Racine 2021 (United States) Prospective, multi-centre cohort | Older adult (>70) patients without dementia undergoing major elective non-cardiac surgery between June 2010 and August 2013 in two Harvard-affiliated academic medical centres. | 76.6 (mean) SD 5.2                                                          | 560    | CAM                | Delirium risk during hospital stay | 24%                       |
| Son 2022 (South Korea) Prospective, single-centre cohort     | Patients admitted to a long-term care facility between August 10 and August 25 2020                                                                                             | 72.6 (mean) SD 13.1                                                         | 33     | Short CAM          | Missing                            | 6.4%                      |
| Sun 2021 (Germany) Retrospective, multi-centre cohort        | Inpatients of four hospitals with HER data from 2004 to 2020; from 2009 to 2020; from 2014 to 2020; and from 2009 to 2020.                                                      | 61.3, 66.0, 66.4, and 64.8 years for the four hospitals                     | 858    | ICD10 F05          | Missing                            | 46%, 40%, and 58% and 57% |
| Veeranki 2019 (Austria) Retrospective multi-centre cohort    | Inpatients at a hospital network.                                                                                                                                               | NR                                                                          | 24,972 | ICD10 F05          | Missing                            | Missing                   |
| Veeranki 2018 (Austria) Retrospective, single centre cohort  | Patients at a hospital network a date of admission between 2012 and 2017                                                                                                        | NR                                                                          | 3800   | ICD10 F05          | Missing                            | Missing                   |
| Wang 2020 (China) Retrospective, single site cohort          | Patients with primary cranial nerve disease undergoing decompression surgery at one hospital between July 2007 and June 2018.                                                   | Mean age 59.2 (SD 10.2) for no delirium, 61.0 (SD 11.7) for delirium cohort | 912    | DSM-5              | Delirium risk during hospital stay | 24.2%                     |
| Wong 2018 (United States) Retrospective single-site cohort   | Adult patients with non-ICU hospital stays and discharged from a academic health institution between                                                                            | 36.2% were older than 64 years                                              |        | CAM-ICU & Nu-DESC  | Delirium risk during hospital stay | 4.8%                      |

| Author (Country) Study type                                  | Population                                                                                                               | Age in years (median unless otherwise stated)                  | n      | Reference standard                                                                                                                 | Model output                        | Delirium occurrence                                    |
|--------------------------------------------------------------|--------------------------------------------------------------------------------------------------------------------------|----------------------------------------------------------------|--------|------------------------------------------------------------------------------------------------------------------------------------|-------------------------------------|--------------------------------------------------------|
|                                                              | January 1, 2016, and August 31, 2017.                                                                                    |                                                                | 14227  |                                                                                                                                    |                                     |                                                        |
| Xue 2021 (United States) Retrospective single-site cohort    | Adults at a single academic medical center from June 1, 2012, to August 31, 2016.                                        | 54.4 (mean) (SD 16.8)                                          | 111888 | CAM-ICU                                                                                                                            | Delirium risk during hospital stay  | 52.6%                                                  |
| Xue 2022 (China) Retrospective single-site cohort            | Patients at one teaching hospital at risk of acute kidney injury after primary cardiovascular surgery.                   | 62.3 (mean) (SD 11.06)                                         | 66     | DSM-IV                                                                                                                             | Delirium during post-operative stay | 29.1%                                                  |
| H Zhao 2021 (China) Retrospective single-site cohort         | Patients ≥65 years at University hospital undergoing hip fracture repair surgery between June 1, 2018, and May 31, 2019. | 79.3 (7.6) in delirium group; 80.0 (7.1) in non-delirium group | 245    | CAM                                                                                                                                | Delirium risk during hospital stay  | 12.2%                                                  |
| Y Zhao 2021 (United States) Retrospective single-site cohort | Retrospective cohort of patients admitted to ICU or emergency department at Boston hospital between 2008 and 2019        | 53.4% of the cohort were ≥65 years                             | 10066  | CAM-ICU or ICD codes                                                                                                               | Delirium risk during hospital stay  | 8.1%                                                   |
|                                                              |                                                                                                                          |                                                                | 5474   | Delirium defined as a rapid change in consciousness characterized by reduced awareness, decreased attention and altered cognition. |                                     |                                                        |
| Amador 2022 (Brazil) Retrospective single-centre cohort      | Patients admitted to three mixed medical and surgical ICUs from July 31 2016 to April 30 2019.                           | Development: 65 (IQR: 54-8), Validation: 65 (IQR: 53-80)       | 1069   |                                                                                                                                    | Delirium during ICU stay            | 10.0% for training cohort; 11.0% for validation cohort |
| Castro 2022 (United States) Retrospective cohort study       | All adults hospitalized with PCR-confirmed SARS-CoV-2 between June 1, 2020, and April 30, 2021, across six hospitals.    | Mean: 62.7 (SD: 18.73)                                         | 5102   | ICD10 F05                                                                                                                          | Delirium risk during hospital stay  | 14.0%                                                  |
| Castro 2021 (United States) Retrospective                    | Patients admitted to 3 hospitals, one academic medical                                                                   | 62.9                                                           | 2907   | ICD10 F05                                                                                                                          | Delirium risk during hospital stay  | 16.8%                                                  |

| Author (Country) Study type                                       | Population                                                                                                                                                                    | Age in years (median unless otherwise stated)                                                                                                                                                                                                         | n     | Reference standard        | Model output                              | Delirium occurrence                                                                                               |
|-------------------------------------------------------------------|-------------------------------------------------------------------------------------------------------------------------------------------------------------------------------|-------------------------------------------------------------------------------------------------------------------------------------------------------------------------------------------------------------------------------------------------------|-------|---------------------------|-------------------------------------------|-------------------------------------------------------------------------------------------------------------------|
| multi-centre cohort                                               | center, 2 community hospitals.                                                                                                                                                |                                                                                                                                                                                                                                                       |       |                           |                                           |                                                                                                                   |
| Hur 2021 (South Korea) Retrospective single-centre cohort         | Critically ill patients admitted to ICUs of a single hospital from July 1, 2016, to August 31, 2019.                                                                          | Mean: 65.4 (SD: 14.4) for cases and 61.1 (SD: 13.3) for control in training cohort; 65.3 (14.7) for cases and 59.7 (14.0) for control in internal validation cohort; 82.5 (59.7) for cases and 73.7 (52.3) for controls in external validation cohort | 12409 | CAM-ICU                   | Delirium within 24 hours of ICU admission | 30.8%                                                                                                             |
| Oosterhoff 2022 (International) Retrospective multi-centre cohort | Patients undergoing surgical hip fracture repair admitted to one of 67 participating hospitals and entered into the Australian and New Zealand Hip Fracture Registry (ANZHFR) | 66% older than 80 in development cohort; 71% older than 80 in validation cohort.                                                                                                                                                                      | 6672  | CAM, CAM-ICU, 3D-CAM, 4AT | Delirium during postoperative period      | 29% in training cohort; 39.0% in validation cohort                                                                |
| Jauk 2019 (Austria) Prospective multi-centre cohort               | Patients admitted to hospitals in an Austrian hospital network between 2011 to 2018                                                                                           | NR                                                                                                                                                                                                                                                    | 19904 | ICD10 F05                 | Missing                                   | 6459 delirium cases and 13,445 randomly selected controls from internal medicine and surgical departments (32.5%) |

**Abbreviations:** CI, Confidence interval; POD, Postoperative delirium; CAM-ICU, Confusion assessment method for the intensive care unit; CAM, Confusion assessment method; 4AT, 4 A's test; 3D-CAM; 3-Minute diagnostic confusion assessment method; Nu-DESC, Nursing-based delirium screening; ICD, International Classification of Diseases; DSM, Diagnostic Statistical Manual; NR=not reported; LOS=length of stay.
