# Supplementary material
Source: HighWire-hosted journal article supplement (https://informatics.bmj.com/content/30/1/e100767)
Supplement: inline-supplementary-material-3 [file inline-supplementary-material-3.pdf]

Supplement Table 2. Performance measures of included studies. \*95%CI inserted when reported

| Authors     | Model(s)                                                                                                                                                     | Best-performing Model (by AU-ROC) | Training data source              | Comparator                                                                         | Sensitivity (%) | Specificity (%) | AU-ROC*                | PPV (%) | NPV (%) | Calibration                                                                          |
|-------------|--------------------------------------------------------------------------------------------------------------------------------------------------------------|-----------------------------------|-----------------------------------|------------------------------------------------------------------------------------|-----------------|-----------------|------------------------|---------|---------|--------------------------------------------------------------------------------------|
| Jauk 2020   | Random Forest                                                                                                                                                | Random Forest                     | Longitudinal EHR data .           | Expert opinion                                                                     | 74.1            | 82.2            | 0.85                   | 5.8     | 99.5    | Low concordance on calibration plot                                                  |
| Jauk 2022   | Random Forest                                                                                                                                                | Random Forest                     | Longitudinal EHR data             | Senior physician delirium risk estimation                                          | 100.0           | 90.6            | 0.92 (0.9155 - 0.9392) | NR      | NR      | Low concordance on calibration plot                                                  |
| Sun 2022    | Natural Language processing                                                                                                                                  | Natural Language Processing       | Retrospective structured EHR data | Compared prospective performance with retrospective and cross-hospital evaluations | NR              | NR              | 0.94                   | NR      | NR      | Used a calibration tool for cross-hospital evaluation but metric not clearly stated. |
| Kramer 2017 | Random Forest; Artificial Neural Network; Support Vector Machine; Logistic Regression; k nearest neighbour; Other: Linear Discriminant Analysis, Elastic Net | Random Forest                     | Retrospective HER data            | NR                                                                                 | 69.0            | 90.0            | 0.91                   | NR      | NR      | NR                                                                                   |

| Authors            | Model(s)                                                                               | Best-performing Model (by AU-ROC) | Training data source                                                                                                                                    | Comparator                                                                                                                          | Sensitivity (%)    | Specificity (%)    | AU-ROC*             | PPV (%)            | NPV (%)              | Calibration                          |
|--------------------|----------------------------------------------------------------------------------------|-----------------------------------|---------------------------------------------------------------------------------------------------------------------------------------------------------|-------------------------------------------------------------------------------------------------------------------------------------|--------------------|--------------------|---------------------|--------------------|----------------------|--------------------------------------|
| Bishara 2022       | Gradient Boosting (e.g., GBM, XGBoost); Artificial Neural Network                      | Gradient Boosting                 | Pragmatically collected Retrospective EHR data                                                                                                          | Regression model using clinician-selected variables and a delirium risk stratification tool (AWOL-S)                                | 80.6 (77.1%-84.1%) | 73.7 (72.4%-74.9%) | 0.852 (0.84 - 0.86) | 14.4 (13.5%-15.3%) | 98.6 (98.3 %-98.8% ) | High concordance on calibration plot |
| Cano-Escalera 2022 | Random Forest; Gradient Boosting (e.g., GBM, XGBoost); k nearest neighbour             | Random Forest                     | Sociodemographic data, personal antecedent, and clinical data extracted from EHRs, in addition to information from functional status and frailty tests. | NR                                                                                                                                  | NR                 | NR                 | 0.745               | NR                 | NR                   | NR                                   |
| Coombes 2021       | Random Forest; Decision Tree; Support Vector Machine; Logistic Regression; Naive Bayes | Logistic Regression               | Medical Information Mart for Intensive Care-III database (MIMIC-III)                                                                                    | Compared best model with two models previously proposed in the literature for goodness of fit, precision, and biological validation | 79.4               | 71.5               | 0.83                | 19.7               | 97.6                 | NR                                   |
| Corradi 2018       | Random Forest                                                                          | Random Forest                     | Retrospective EHR data                                                                                                                                  | NR                                                                                                                                  | 69.8               | 92.7               | 0.91 (0.90 - 0.92)  | NR                 | NR                   | Low concordance on calibration plot  |

| Authors       | Model(s)                                                                                           | Best-performing Model (by AU-ROC)                    | Training data source                                                    | Comparator                                                                                                                                 | Sensitivity (%)    | Specificity (%)                | AU-ROC*            | PPV (%) | NPV (%) | Calibration                                                               |
|---------------|----------------------------------------------------------------------------------------------------|------------------------------------------------------|-------------------------------------------------------------------------|--------------------------------------------------------------------------------------------------------------------------------------------|--------------------|--------------------------------|--------------------|---------|---------|---------------------------------------------------------------------------|
| Davoudi 2017  | Random Forest; Support Vector Machine; Linear Regression; Other: Generalised additive models       | Generalised Additive Model                           | Preoperative EHR data collected on admission                            | NR                                                                                                                                         | 75.0 (0.69 - 0.83) | 1.0 (0.76 - 0.83) <sup>8</sup> | 0.86 (0.84 - 0.88) | NR      | NR      | NR                                                                        |
| Gutheil 2022  | Gradient Boosting (e.g., GBM, XGBoost); Artificial Neural Network                                  | Self-Attention and Intersample Attention Transformer | Data from a benchmarking and reporting system                           | NR                                                                                                                                         | NR                 | NR                             | 0.82 (0.76 - 0.87) | NR      | NR      | NR                                                                        |
| Halladay 2018 | Random Forest                                                                                      | Random Forest                                        | Data from the Veteran Affairs (VA) External Peer Review Program (EPRP). | Compared random forest generated consolidated NICE rule with previously confirmed scoring algorithms (electronic NICE and Pendlebury NICE) | NR                 | NR                             | 0.91 (0.91 - 0.92) | 47.0    | 96.0    | NR                                                                        |
| Hu 2022       | Random Forest; Gradient Boosting (e.g., GBM, XGBoost); Support Vector Machine; Logistic Regression | Logistic Regression                                  | Clinical data from observational study                                  | NR                                                                                                                                         | 89.1 (79.1 - 95.0) | 44.2 (31.1 - 58.3)             | 0.80 (0.72 - 0.89) | NR      | NR      | High concordance on calibration plot and satisfactory Brier score (0.151) |

| Authors     | Model(s)                                                    | Best-performing Model (by AU-ROC) | Training data source                                                                                                          | Comparator                                                                                 | Sensitivity (%)    | Specificity (%)      | AU-ROC*              | PPV (%) | NPV (%) | Calibration |
|-------------|-------------------------------------------------------------|-----------------------------------|-------------------------------------------------------------------------------------------------------------------------------|--------------------------------------------------------------------------------------------|--------------------|----------------------|----------------------|---------|---------|-------------|
| Jauk 2018   | Random Forest; Artificial Neural Network; Linear Regression | Artificial Neural Network         | Retrospective EHR data                                                                                                        | Compared prevalence of diabetes in patients with and without delirium, standardised by age | ~82.5 (~80.0-85.0) | ~73.0 (~71.0 – 75.0) | 0.46 (0.836 - 0.857) | NR      | NR      | NR          |
| Ji 2018     | Artificial Neural Network                                   | Artificial Neural Network         | Secondary data from an observational study, including sociodemographic, clinical, laboratory, and pharmacological information | NR                                                                                         | NR                 | NR                   | 0.89                 | NR      | NR      | NR          |
| Kurusu 2022 | Decision Tree                                               | Decision Tree                     | Secondary data from a multicenter prospective observational study                                                             | NR                                                                                         | 60.5               | 82.2                 | 0.72 (0.63 - 0.81)   | NR      | NR      | NR          |

| Authors         | Model(s)                                                                                        | Best-performing Model (by AU-ROC) | Training data source                                                                                                      | Comparator                                                                                                                  | Sensitivity (%)    | Specificity (%)    | AU-ROC*            | PPV (%) | NPV (%) | Calibration                      |
|-----------------|-------------------------------------------------------------------------------------------------|-----------------------------------|---------------------------------------------------------------------------------------------------------------------------|-----------------------------------------------------------------------------------------------------------------------------|--------------------|--------------------|--------------------|---------|---------|----------------------------------|
| Li 2022         | Random Forest; Gradient Boosting (e.g., GBM, XGBoost); Decision Tree; Logistic Regression       | Decision Tree                     | Prospective cohort dataset with basic information, clinical signs and symptoms, laboratory findings, and scale variables. | NR                                                                                                                          | 93.3               | 94.3               | 0.95               | 71.8    | 98.9    | NR                               |
| Lucini 2020     | Random Forest; Artificial Neural Network; Support Vector Machine; Logistic Regression; AdaBoost | Logistic Regression               | Data obtained from a data repository specific to ICUs across Alberta, Canada                                              | NR                                                                                                                          | 84.0 (83.9 – 84.1) | 86.5 (86.5 – 86.5) | 0.85 (0.82 - 0.88) | NR      | NR      | NR                               |
| Menzenbach 2022 | Gradient Boosting (e.g., GBM, XGBoost)                                                          | Gradient Boosting                 | Preoperative dataset with structured data and test results entered into REDCap electronic database.                       | Predictor selection by experts (Investigators vs external DELirium Prediction based on Hospital Information (DELPHI) score) | NR                 | NR                 | 0.77 (0.65 - 0.85) | NR      | NR      | Satisfactory Brier score (0.142) |

| Authors     | Model(s)                                                                                                                                           | Best-performing Model (by AU-ROC) | Training data source                                | Comparator                                                                                                            | Sensitivity (%) | Specificity (%) | AU-ROC*               | PPV (%) | NPV (%) | Calibration |
|-------------|----------------------------------------------------------------------------------------------------------------------------------------------------|-----------------------------------|-----------------------------------------------------|-----------------------------------------------------------------------------------------------------------------------|-----------------|-----------------|-----------------------|---------|---------|-------------|
| Mufti 2019  | Random Forest; Decision Tree; Artificial Neural Network; Support Vector Machine; Logistic Regression; Naive Bayes; Other: Bayesian belief networks | Artificial Neural Network         | Prospective registry of all cardiac surgical cases. | Compared feature importance of input variables in the random forest model to univariate logistic regression analysis. | 67.7            | 72.9            | 0.78<br>(0.72 - 0.84) | 24.3    | 94.6    | NR          |
| Netzer 2020 | Random Forest; Decision Tree; Support Vector Machine; Logistic Regression; Naive Bayes; k nearest neighbour; Other: Multilayer perceptron          | Random Forest                     | Retrospective EHR data                              | Predictive ability (Kappa) of DOSS and CAM delirium screening methods.                                                | NR              | NR              | 0.87                  | NR      | NR      | NR          |

| Authors         | Model(s)                                                                                                                                                                                                 | Best-performing Model (by AU-ROC) | Training data source                                         | Comparator                                                               | Sensitivity (%) | Specificity (%) | AU-ROC*            | PPV (%) | NPV (%) | Calibration                                                              |
|-----------------|----------------------------------------------------------------------------------------------------------------------------------------------------------------------------------------------------------|-----------------------------------|--------------------------------------------------------------|--------------------------------------------------------------------------|-----------------|-----------------|--------------------|---------|---------|--------------------------------------------------------------------------|
| Oh 2018         | Support Vector Machine; Other: SVM with radial basis function (RBF) kernels, linear extreme learning machine (ELM), ELM with RBF kernels, linear discriminant analysis & quadratic discriminant analysis | SVM with RBF Kernels              | Heart rate variability data obtained from electrocardiograms | NR                                                                       | 91.3            | 90.8            | NR                 | 91.6    | 90.55   | NR                                                                       |
| Oosterhoff 2021 | Random Forest; Gradient Boosting (e.g., GBM, XGBoost); Artificial Neural Network; Support Vector Machine; Logistic Regression                                                                            | Logistic Regression               | Data from NSQIP database                                     | Default strategies of decision change and preoperative delirium presence | NR              | NR              | 0.79 (0.77 - 0.80) | NR      | NR      | High concordance on calibration plot and satisfactory Brier score (0.15) |

| Authors     | Model(s)                                                                                                                                           | Best-performing Model (by AU-ROC) | Training data source                                                                      | Comparator                                                                                                                                                                     | Sensitivity (%) | Specificity (%) | AU-ROC*            | PPV (%) | NPV (%) | Calibration                                                                          |
|-------------|----------------------------------------------------------------------------------------------------------------------------------------------------|-----------------------------------|-------------------------------------------------------------------------------------------|--------------------------------------------------------------------------------------------------------------------------------------------------------------------------------|-----------------|-----------------|--------------------|---------|---------|--------------------------------------------------------------------------------------|
| Racine 2021 | Random Forest; Gradient Boosting (e.g., GBM, XGBoost); Artificial Neural Network; Logistic Regression                                              | Artificial Neural Network         | Secondary analysis of a prospective study (Successful Aging after Elective Surgery study) | Standard approach for delirium prediction, including backwards stepwise logistic regression and a previously published delirium risk prediction rule for hospitalised patients | 50.0            | 82.0            | 0.71 (0.58 - 0.83) | 46.0    | 84.0    | Low concordance on calibration plot                                                  |
| Son 2022    | Random Forest; Artificial Neural Network; Support Vector Machine; Logistic Regression; Other: Four rule-mining algorithms (C4.5, CBA, MCAR & LEM2) | LEM2 Rule Mining                  | Retrospective EHR data                                                                    | NR                                                                                                                                                                             | 96.7            | NR              | NR                 | 96.74   | NR      | NR                                                                                   |
| Sun 2021    | Natural Language Processing                                                                                                                        | Natural Language Processing       | Retrospective EHR data                                                                    | Compared performance of delirium prediction model trained in the training site with the model generated with the calibration process                                           | NR              | NR              | 0.82               | NR      | NR      | Used a 'calibration tool' in model development, but no calibration metrics reported. |



| Authors       | Model(s)                                                                                         | Best-performing Model (by AU-ROC)              | Training data source                                                                                                                     | Comparator | Sensitivity (%) | Specificity (%) | AU-ROC* | PPV (%) | NPV (%) | Calibration |
|---------------|--------------------------------------------------------------------------------------------------|------------------------------------------------|------------------------------------------------------------------------------------------------------------------------------------------|------------|-----------------|-----------------|---------|---------|---------|-------------|
| Veeranki 2019 | Random Forest; Logistic Regression; Other: Random forest in combination with logistic regression | Combined logistic Regression and Random forest | Retrospective demographic data, diagnoses, procedures, laboratory results, nursing assessments obtained from hospital information system | NR         | NR              | NR              | 0.91    | NR      | NR      | NR          |
| Veeranki 2018 | Random Forest                                                                                    | Random Forest                                  | Data obtained from hospital information systems                                                                                          | NR         | NR              | NR              | 0.90    | NR      | NR      | NR          |
| Wang 2020     | Random Forest; Gradient Boosting (e.g., GBM, XGBoost); Decision Tree; Logistic Regression        | Random Forest                                  | Retrospective EHR data                                                                                                                   | NR         | 0.712           | NR              | 0.96    | 0.887   | NR      | NR          |

| Authors   | Model(s)                                                                                                                      | Best-performing Model (by AU-ROC) | Training data source                                                               | Comparator                                                                                                                                                     | Sensitivity (%)  | Specificity (%)  | AU-ROC*            | PPV (%)          | NPV (%)          | Calibration |
|-----------|-------------------------------------------------------------------------------------------------------------------------------|-----------------------------------|------------------------------------------------------------------------------------|----------------------------------------------------------------------------------------------------------------------------------------------------------------|------------------|------------------|--------------------|------------------|------------------|-------------|
| Wong 2018 | Random Forest; Gradient Boosting (e.g., GBM, XGBoost); Artificial Neural Network; Support Vector Machine; Logistic Regression | Gradient Boosting                 | Retrospective EHR data                                                             | Compared against the 4-point scoring system AWOL (age >79, failure to spell world backwards, disorientation to place, and higher nurse-rated illness severity) | 59.7 (52.4-66.7) | 90.0 (89.0-90.9) | 0.85               | 23.1 (20.5-25.9) | 97.8 (97.4-98.1) | NR          |
| Xue 2021  | Random Forest; Gradient Boosting (e.g., GBM, XGBoost); Artificial Neural Network; Support Vector Machine; Logistic Regression | Gradient Boosting                 | Retrospective data from electronic anaesthesia and preoperative assessment records | NR                                                                                                                                                             | 31.1 (30.3-32.0) | 95.0 (94.9-95.0) | 0.76 (0.76 - 0.76) | NR               | NR               | NR          |
| Xue 2022  | Multilayer perceptron                                                                                                         | Multilayer Perceptron             | Retrospective EHR data                                                             | NR                                                                                                                                                             | NR               | NR               | 0.90               | NR               | NR               | NR          |

| Authors     | Model(s)                                                                                                                         | Best-performing Model (by AU-ROC) | Training data source                                                                                                                                              | Comparator                                                                                                                                                   | Sensitivity (%) | Specificity (%) | AU-ROC*              | PPV (%) | NPV (%) | Calibration |
|-------------|----------------------------------------------------------------------------------------------------------------------------------|-----------------------------------|-------------------------------------------------------------------------------------------------------------------------------------------------------------------|--------------------------------------------------------------------------------------------------------------------------------------------------------------|-----------------|-----------------|----------------------|---------|---------|-------------|
| H Zhao 2021 | Random Forest; Gradient Boosting (e.g., GBM, XGBoost); Support Vector Machine; Logistic Regression; Other: Multilayer Perceptron | Logistic Regression               | Data obtained from Anesthesia Information Management System (AIMS)                                                                                                | NR                                                                                                                                                           | NR              | NR              | 0.78<br>(0.70, 0.86) | NR      | NR      | NR          |
| Y Zhao 2021 | Random Forest; Gradient Boosting (e.g., GBM, XGBoost); Logistic Regression                                                       | Logistic Regression               | MIMIC-IV open-access dataset                                                                                                                                      | NR                                                                                                                                                           | NR              | NR              | 0.69                 | NR      | NR      | NR          |
| Amador 2022 | Gradient Boosting (e.g., GBM, XGBoost)                                                                                           | Gradient Boosting                 | Retrospectively collected data obtained from patient administrative data, laboratory results and vital signs available within the first hour after ICU admission. | Compared lightGBM regularised algorithm with XGBoost, Random Forest, and Logistic Regression in terms of gains for robustness and stability of explanations. | NR              | NR              | 0.86                 | NR      | NR      | NR          |

| Authors     | Model(s)                 | Best-performing Model (by AU-ROC) | Training data source                                                                                                                      | Comparator                                                              | Sensitivity (%) | Specificity (%) | AU-ROC*            | PPV (%)      | NPV (%)      | Calibration                                                                                                            |
|-------------|--------------------------|-----------------------------------|-------------------------------------------------------------------------------------------------------------------------------------------|-------------------------------------------------------------------------|-----------------|-----------------|--------------------|--------------|--------------|------------------------------------------------------------------------------------------------------------------------|
| Castro 2022 | L1-penalized regression. | L1 Penalised Regression           | Retrospective EHR data, including diagnostic, medication, laboratory, and other clinical features available at time of hospital admission | Compared model calibration with initial COVID-9 surge of previous paper | 62 (58 – 65)    | 75 (73 - 76)    | 0.75 (0.73 - 0.77) | 28.0 (91-93) | 92.0 (26-31) | Low concordance on calibration tests (evaluated using both quantile-by-quintile comparison and Spiegelhalter's Z test) |
| Castro 2021 | L1-penalised regression  | L1 Penalised Regression           | Retrospective EHR data                                                                                                                    | NR                                                                      | 73 (65 – 80)    | 69 (65-73)      | 0.75 (0.70 - 0.79) | 35 (30-41)   | 92 (89-94)   | High concordance (evaluated using both quantile-by-quantile comparison and Hosmer-Lemeshow test)                       |

| Authors  | Model(s)                                                                                              | Best-performing Model (by AU-ROC) | Training data source                                                                                                                                                                                                                                                                                                                      | Comparator | Sensitivity (%)    | Specificity (%)  | AU-ROC*              | PPV (%)          | NPV (%)          | Calibration                      |
|----------|-------------------------------------------------------------------------------------------------------|-----------------------------------|-------------------------------------------------------------------------------------------------------------------------------------------------------------------------------------------------------------------------------------------------------------------------------------------------------------------------------------------|------------|--------------------|------------------|----------------------|------------------|------------------|----------------------------------|
| Hur 2021 | Random Forest; Gradient Boosting (e.g., GBM, XGBoost); Artificial Neural Network; Logistic Regression | Random Forest                     | Data from the Clinical Data Warehouse Darwin-C database of the Samsung Medical Centre and the Medical Information Mart for Intensive Care III (MIMIC-III) database (v1.4). The Samsung Medical Centre data set was used for the derivation and validation cohort, and the MIMIC-III data set was used for the external validation cohort. | NR         | 91.0 (90.4 – 90.5) | 27.0 (26.6–27.3) | 0.72 (0.720 - 0.721) | 15.9 (15.9-16.0) | 95.2 (95.1-95.3) | Satisfactory Brier Score (0.168) |

| Authors         | Model(s)                                           | Best-performing Model (by AU-ROC)      | Training data source                                                                    | Comparator                                                                                                      | Sensitivity (%) | Specificity (%) | AU-ROC*              | PPV (%) | NPV (%) | Calibration                                                              |
|-----------------|----------------------------------------------------|----------------------------------------|-----------------------------------------------------------------------------------------|-----------------------------------------------------------------------------------------------------------------|-----------------|-----------------|----------------------|---------|---------|--------------------------------------------------------------------------|
| Oosterhoff 2022 | Elastic-net<br>Penalised<br>Logistic<br>Regression | Elastic-net<br>Penalised<br>Regression | Postoperative EHR data from the NSQIP targeted files for hip fractures                  | NR                                                                                                              | NR              | NR              | 0.74 (0.73 - 0.76)   | NR      | NR      | High concordance on calibration plot and satisfactory Brier score (0.22) |
| Jauk 2019       | Random Forest                                      | Random forest                          | Data obtained from hospital information system implemented on German software platforms | Compared model specifically trained on data with NR values to a currently-implemented delirium prediction model | NR              | NR              | 0.83 (0.818 - 0.841) | NR      | NR      | NR                                                                       |

**Abbreviations:** LR, Logistic Regression; RF, Random Forest; SAINTENS, Self-Attention and Intersample Attention Transformer; SVM, Support Vector Machine; RBF, Radial basis function; AU-ROC, Area under the receiving operating curve; PPV, Positive predictive value; NPV, Negative predictive value; AWOL-S, Age, WORLD backwards, Orientation, Illness severity, Surgery-specific risk; DOSS, Delirium Observation Screening Scale. NR=not reported; NSQIP=National Surgical Quality Improvement Program
